# Supplementary material for: Potential of breadfruit cultivation to contribute to climate-resilient low latitude food systems
Source: PLOS journal article supplement (doi:10.1371/journal.pclm.0000062), 2022-08-17
Supplement: S4 (10.1371/journal.pclm.0000062.s004) [file journal.pclm.0000062.s004]

**S1 Table**

|  | Bioclimactic Variable | MAXENT | GLM | GAM | MARS | RF | GBM | Average |
| --- | --- | --- | --- | --- | --- | --- | --- | --- |
| BIO2 | Mean Diurnal Range | 0.201 | 0.046 | 0.123 | 0.081 | 0.063 | 0.042 | 0.093 |
| BIO7 | Temperature Annual Range (BIO5-BIO6) | 0.312 | 0.543 | 0.403 | 0.381 | 0.312 | 0.454 | 0.401 |
| BIO11 | Mean Temperature of Coldest Quarter | 0.194 | 0.052 | 0.191 | 0.124 | 0.098 | 0.033 | 0.115 |
| BIO12 | Annual Precipitation | 0.232 | 0.115 | 0.216 | 0.130 | 0.057 | 0.029 | 0.130 |
| BIO17 | Precipitation of Driest Quarter | 0.121 | 0.027 | 0.106 | 0.055 | 0.031 | 0.025 | 0.061 |
| BIO18 | Precipitation of Warmest Quarter | 0.150 | 0.063 | 0.107 | 0.026 | 0.038 | 0.016 | 0.067 |
| BIO19 | Precipitation of Coldest Quarter | 0.185 | 0.012 | 0.104 | 0.069 | 0.034 | 0.016 | 0.070 |
