# Supplementary material for: Potential of breadfruit cultivation to contribute to climate-resilient low latitude food systems
Source: PLOS journal article supplement (doi:10.1371/journal.pclm.0000062), 2022-08-17
Supplement: S6 (10.1371/journal.pclm.0000062.s006) [file journal.pclm.0000062.s006]

**S3 Table.**

| Suitability | GCM | Area - SSP2-4.5 | | Area - SSP5-8.5 |
| --- | --- | --- | --- | --- |
| Fair | BCC-CSM2-MR | 16127181 | 17010437 | |
| CanESM5 | 16386867 | 17383498 | |
| CNRM-CM6-1 | 15938225 | 17329833 | |
| CNRM-ESM2-1 | 16025173 | 17377793 | |
| IPSL-CM6A-LR | 15660300 | 17401963 | |
| MIROC-ES2L | 14538802 | 15165247 | |
| MIROC6 | 14200092 | 15245630 | |
| MRI-ESM2-0 | 13900888 | 15981020 | |
| Good | BCC-CSM2-MR | 9364025 | 8533701 | |
| CanESM5 | 8101903 | 7002352 | |
| CNRM-CM6-1 | 9571089 | 8025798 | |
| CNRM-ESM2-1 | 9442967 | 7896402 | |
| IPSL-CM6A-LR | 10249666 | 8673592 | |
| MIROC-ES2L | 10186645 | 9507514 | |
| MIROC6 | 10498834 | 8805485 | |
| MRI-ESM2-0 | 10430547 | 8993401 | |
| Unsuitable | BCC-CSM2-MR | 72784947 | 72732016 | |
| CanESM5 | 73778272 | 73881192 | |
| CNRM-CM6-1 | 72765857 | 72919540 | |
| CNRM-ESM2-1 | 72807031 | 73000976 | |
| IPSL-CM6A-LR | 72358041 | 72192452 | |
| MIROC-ES2L | 73541595 | 73594281 | |
| MIROC6 | 73576245 | 74224056 | |
| MRI-ESM2-0 | 73944719 | 73301732 | |
